# Supplementary material
Source: Springer Nature journal article supplement (https://www.springermedizin.de/resource/supplementary/12985_2013_2330_MOESM11_ESM.pdf/9606530)

**A**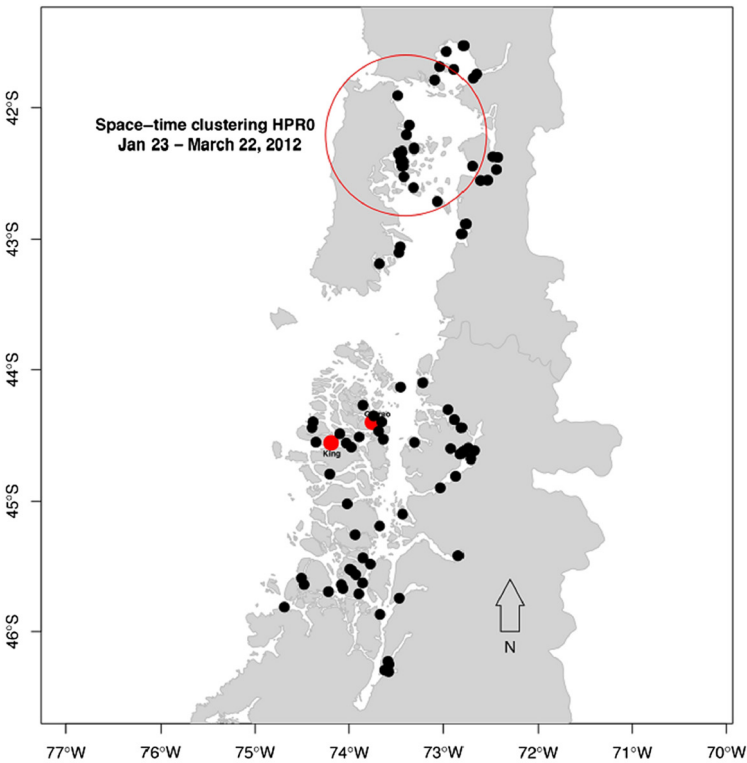**B**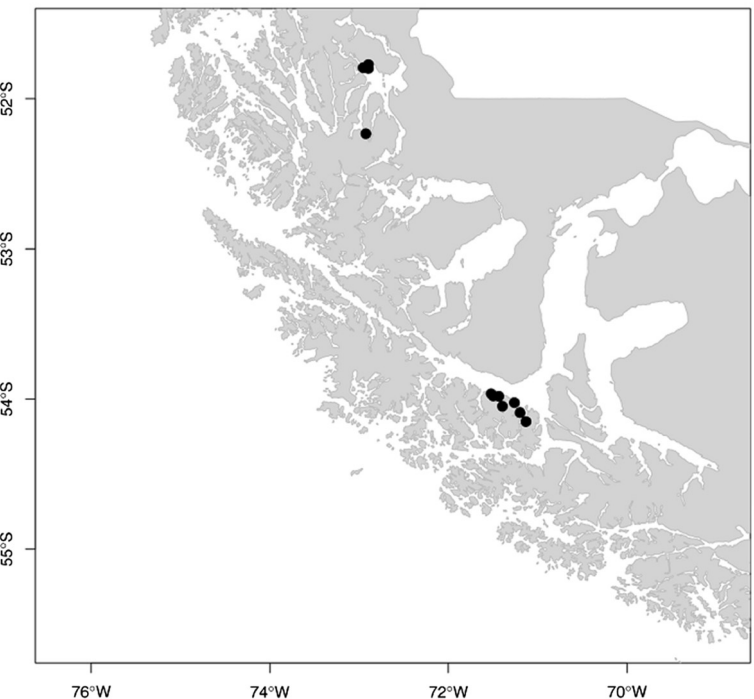

Supplement: MOESM11 [file 9606530]
